# Supplementary material for: Low-catalyst concentration atom transfer radical polymerization of a phosphonium salt-type monomer
Source: Royal Society of Chemistry journal article supplement (doi:10.1039/c2py20303k), 2012-01-01
Supplement: c2py20303k.pdf [file c2py20303k.pdf]

## **Supporting Information for**

### **Low-catalyst concentration atom transfer radical polymerization of a phosphonium salt-type monomer**

Yannick P. Borguet and Nicolay V. Tsarevsky\*

Department of Chemistry, 3215 Daniel Avenue,  
and Center for Drug Discovery, Design and Delivery at Dedman College,  
Southern Methodist University,  
Dallas, TX 75275, USA.

\*Corresponding author: E-mail: nvt@smu.edu; Fax: +1-214-768-4089; Tel: +1-214-768-3259

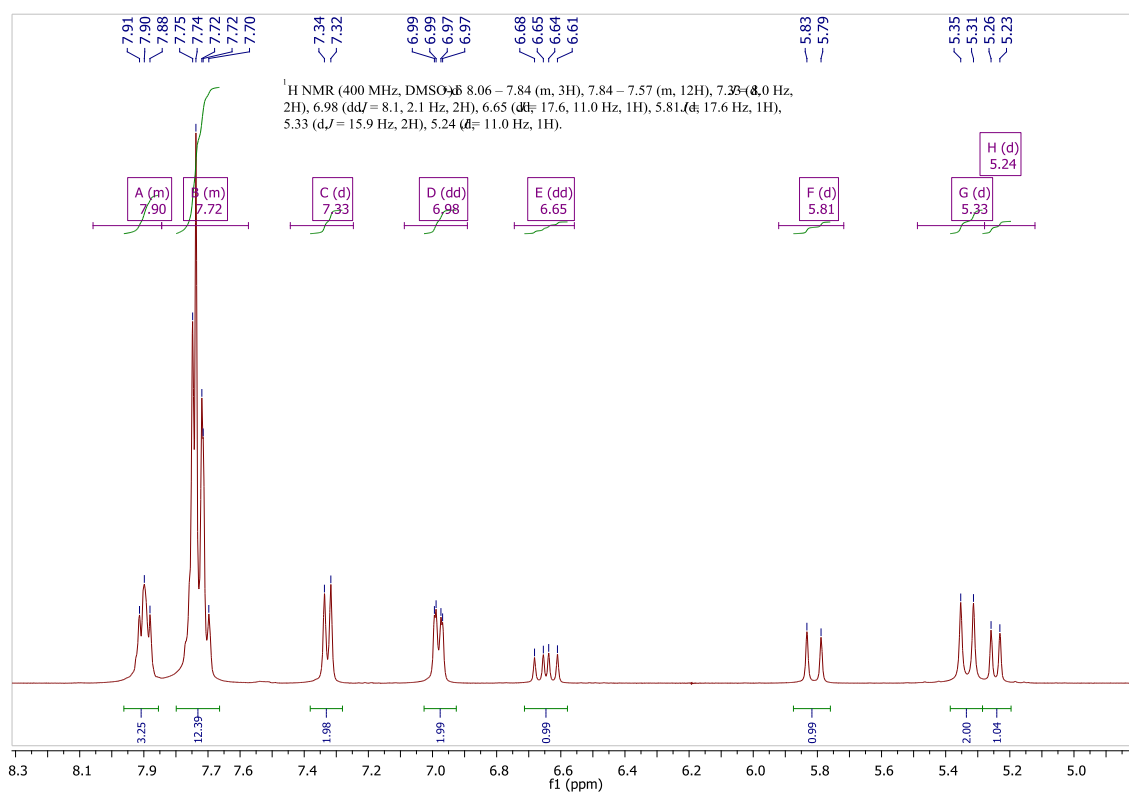

Figure S1. <sup>1</sup>H NMR spectrum of 4VBTPPCI in DMSO-*d*<sub>6</sub>

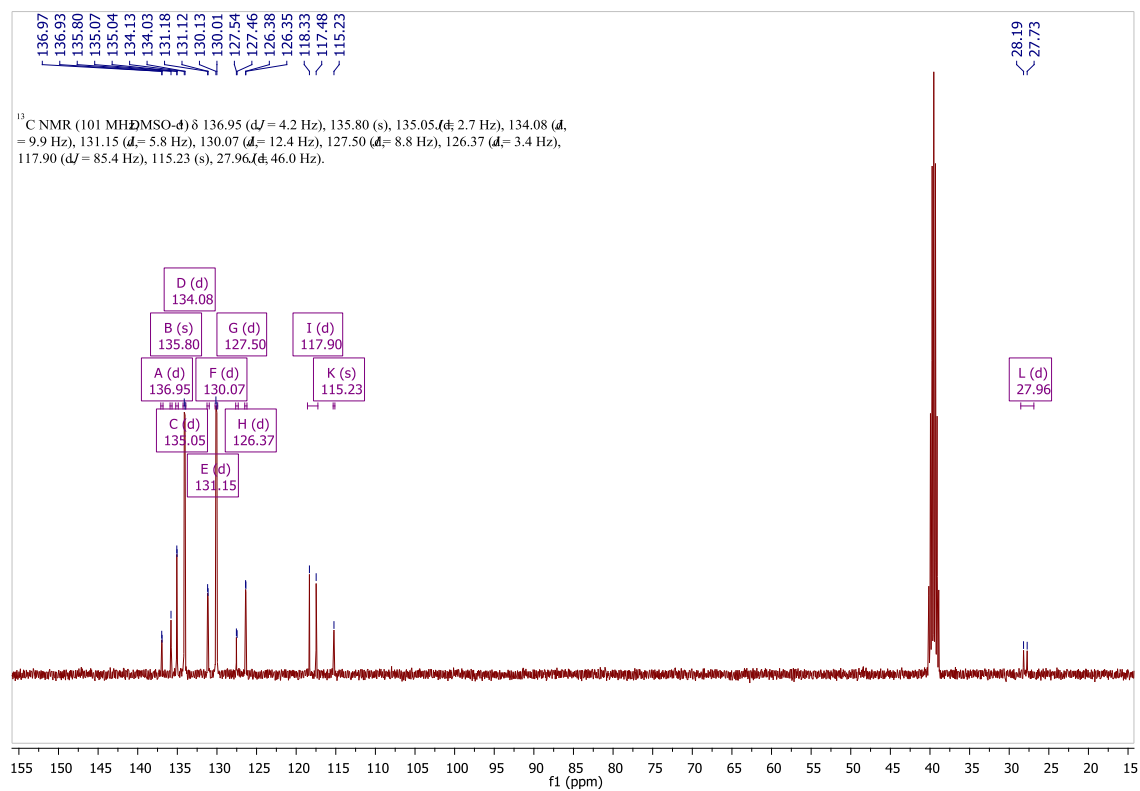

Figure S2. <sup>13</sup>C NMR spectrum of 4VBTPPCI in DMSO-*d*<sub>6</sub>

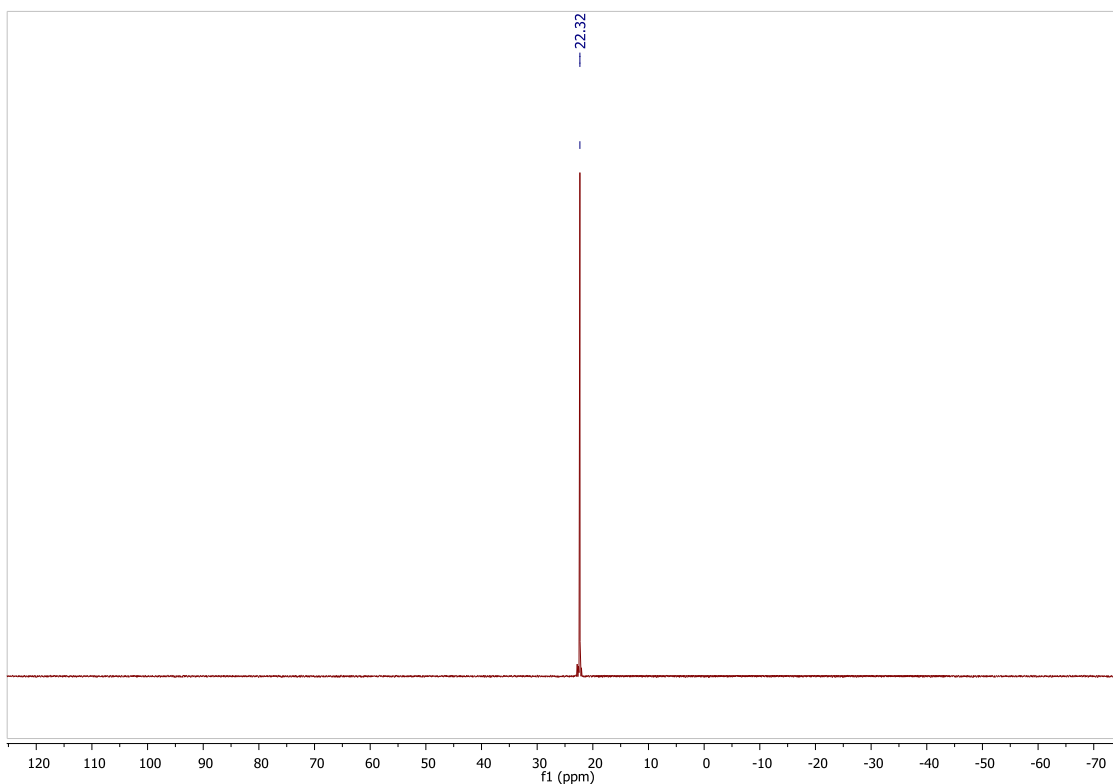

Figure S3.  $\{^1\text{H}\}^{31}\text{P}$  NMR spectrum of 4VBTPPCL in  $\text{DMSO-}d_6$

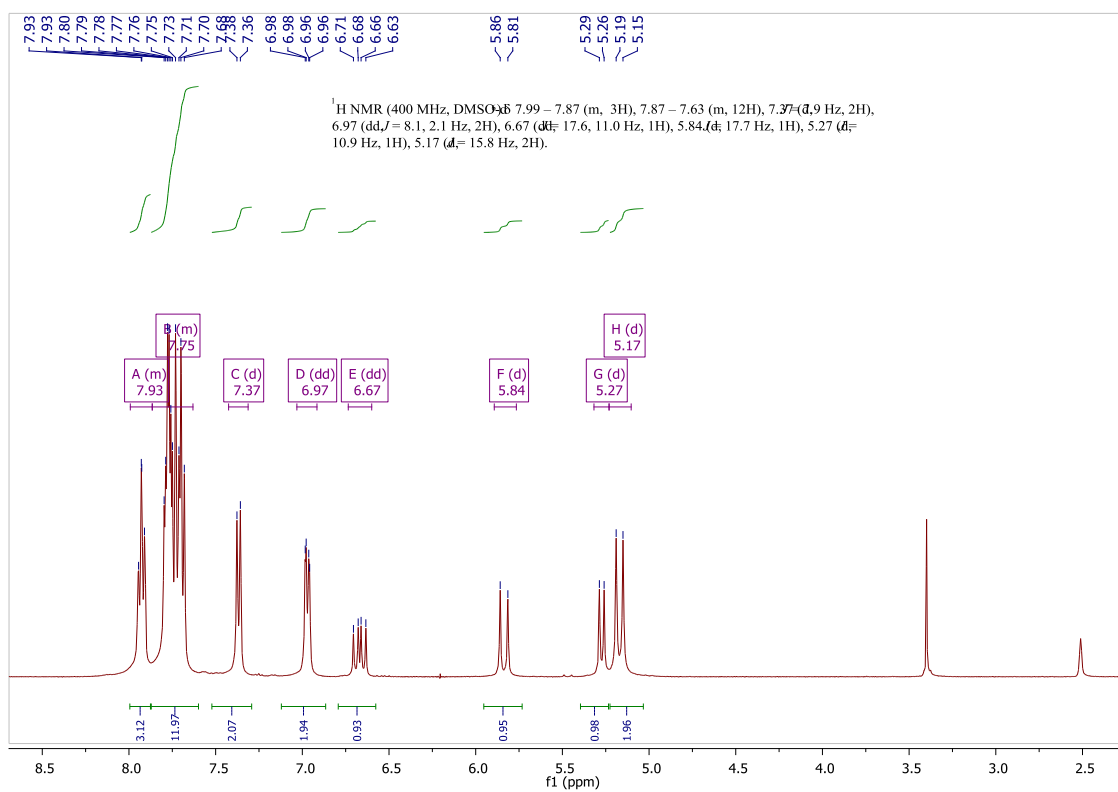

Figure S4.  $^1\text{H}$  NMR spectrum of 4VBTPPBF $_4$  in  $\text{DMSO-}d_6$

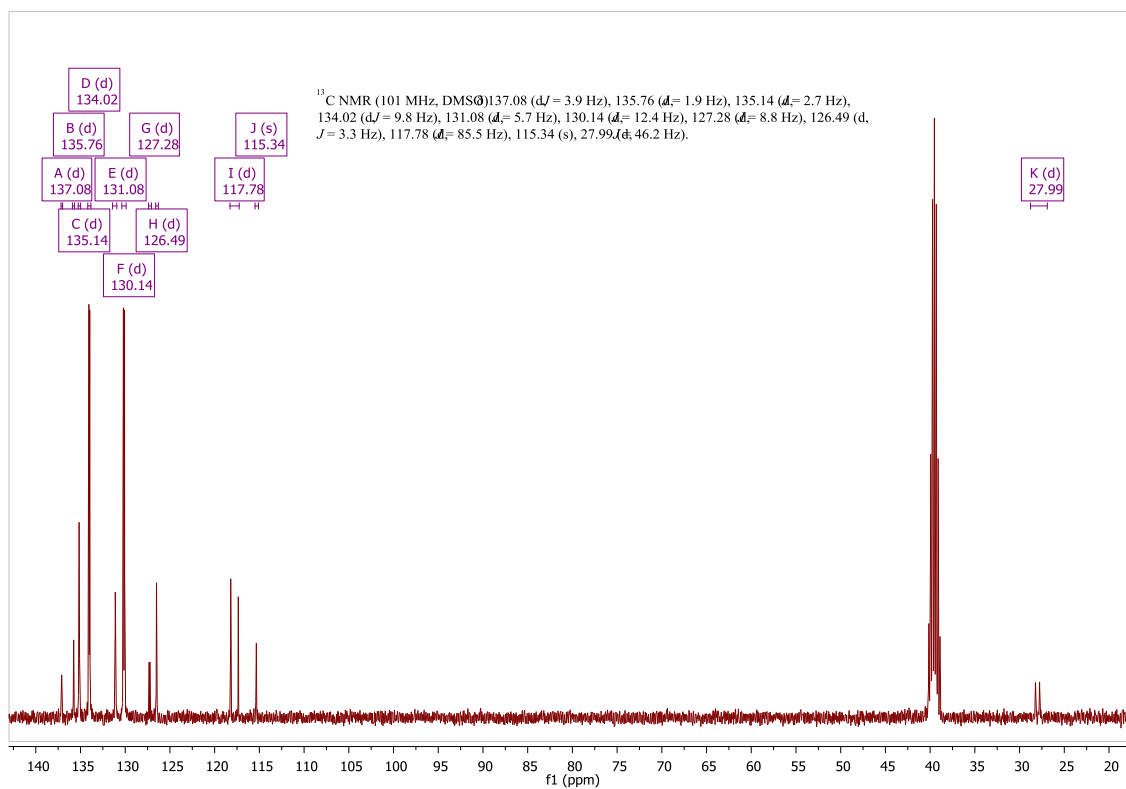

**Figure S5.** <sup>13</sup>C NMR spectrum of 4VBTPPB<sub>4</sub> in DMSO-*d*<sub>6</sub>

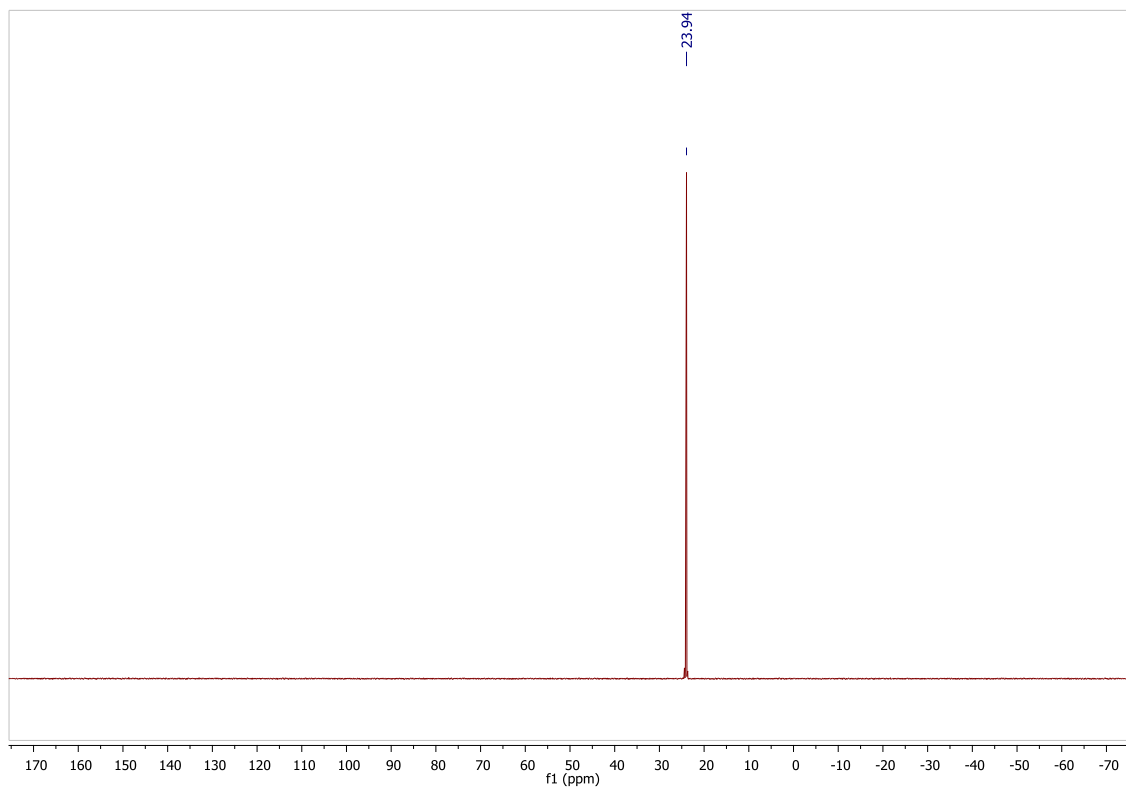

**Figure S6.** <sup>31</sup>P NMR spectrum of 4VBTPPB<sub>4</sub> in DMSO-*d*<sub>6</sub>

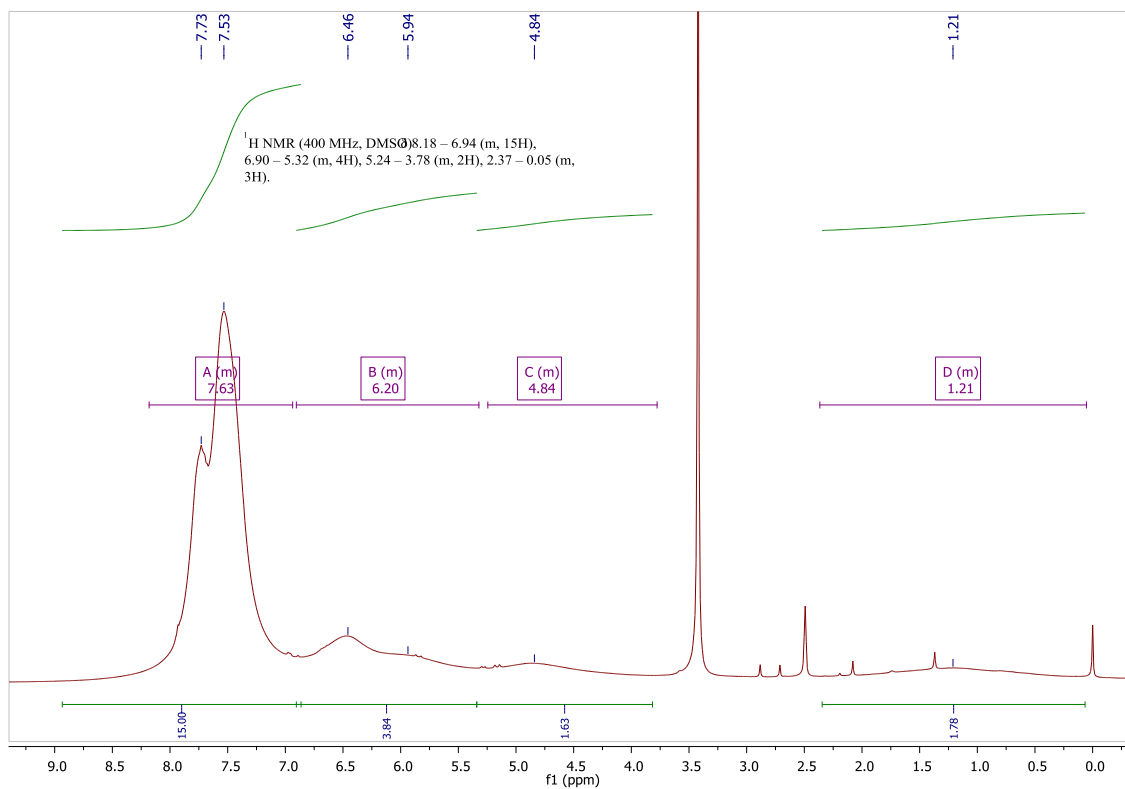

**Figure S7.** <sup>1</sup>H NMR spectrum of poly4VBTPPBF<sub>4</sub> in DMSO-*d*<sub>6</sub>

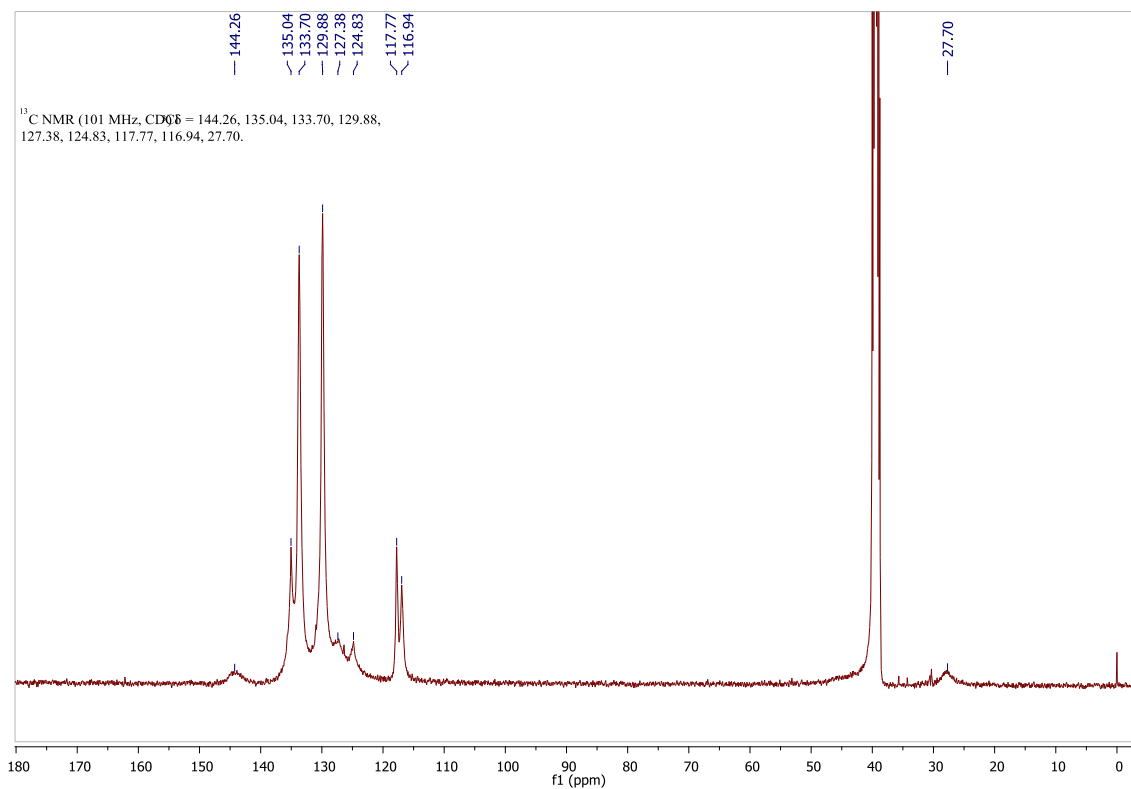

**Figure S8.** <sup>13</sup>C NMR spectrum of poly4VBTPPBF<sub>4</sub> in DMSO-*d*<sub>6</sub>

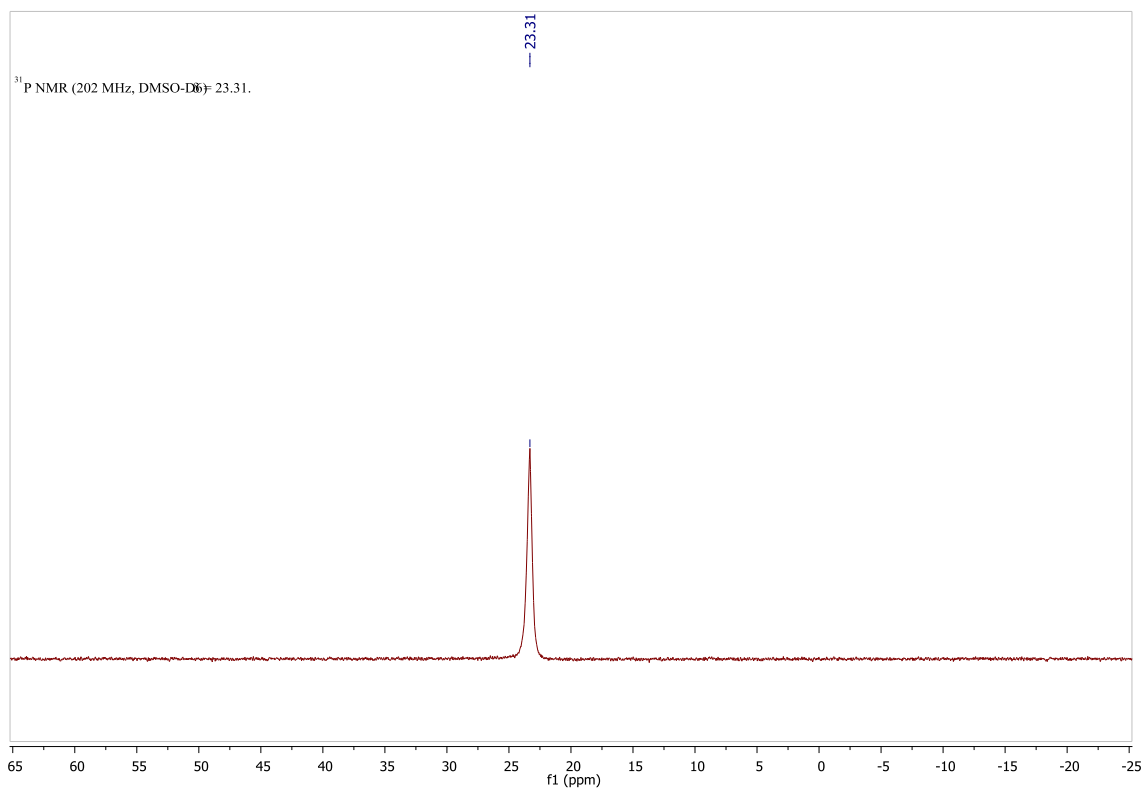

**Figure S9.**  $^{31}\text{P}$  NMR spectrum of poly4VBTPPBF<sub>4</sub> in DMSO- $d_6$

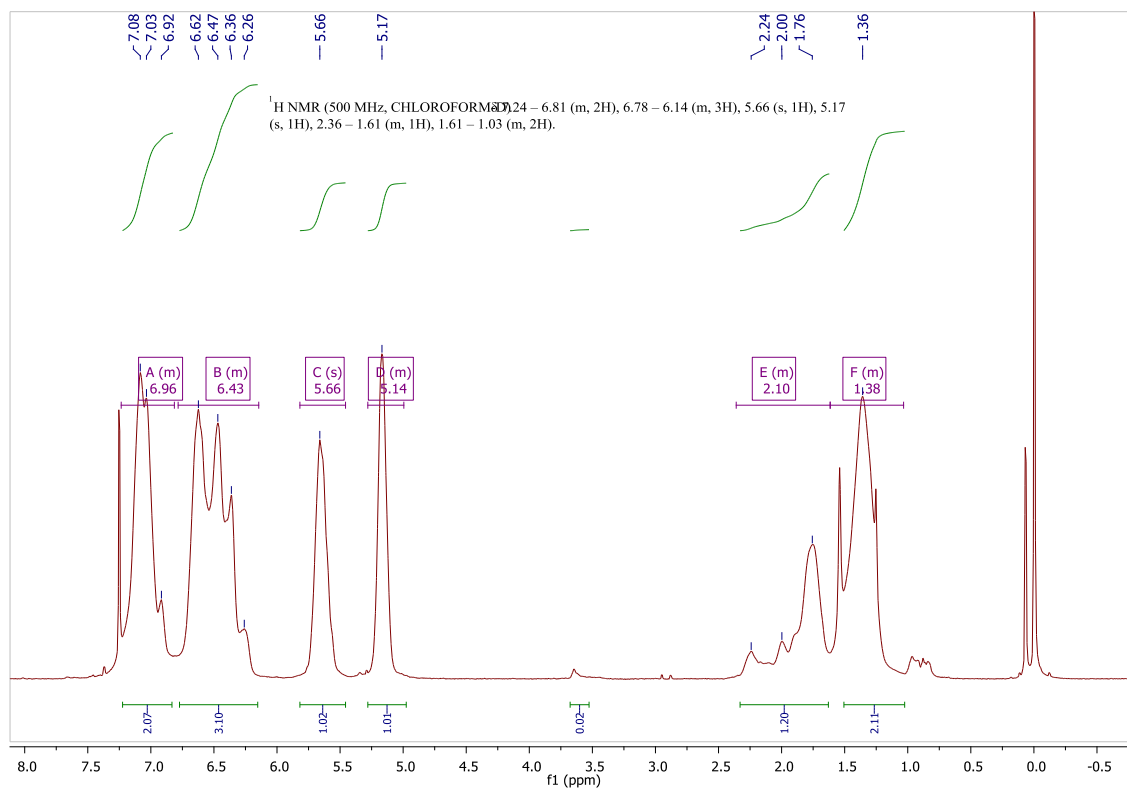

**Figure S10.**  $^1\text{H}$  NMR spectrum of poly4VSty in  $\text{CDCl}_3$

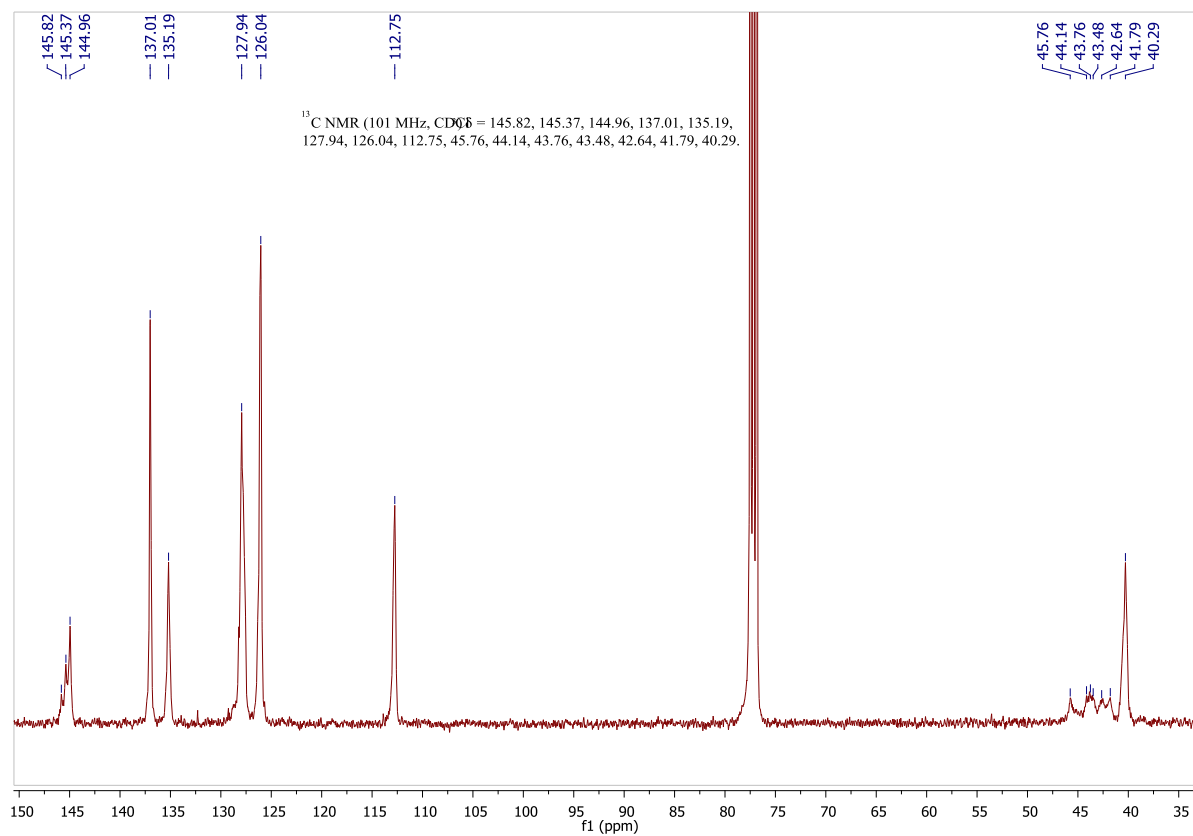

**Figure S11.** <sup>13</sup>C NMR spectrum of poly4VSty in CDCl<sub>3</sub>
